# Supplementary material for: Hemocyte-targeted gene expression in the female malaria mosquito using the hemolectin promoter from Drosophila
Source: PubMed Central journal article supplement (PMC7181189; doi:10.1016/j.ibmb.2020.103339), 2020-05
Supplement: mmc1.pdf [file mmc1.pdf]

1024 **Supplementary Material**

1025

1026 ***Hemolectin* orthology assessments across arthropods**

1027 Identification of putative orthologs of the *Drosophila melanogaster hemolectin* gene in  
1028 arthropod species with sequenced and annotated genomes proceeded by searching genomic  
1029 resources hosted at VectorBase release VB-2019-08 (Giraldo-Calderón et al.) and the  
1030 OrthoDB hierarchical catalog of orthologs versions 9 and 10 (Zdobnov et al.). First,  
1031 VectorBase was searched using the FlyBase gene identifier for *Hemolectin* (FBgn0029167),  
1032 to identify the GeneTree (family of homologous genes) of which it is a member, GeneTree  
1033 VBG00190000010751. GeneTrees are built automatically by VectorBase using the  
1034 EnsemblCompara pipeline (Vilella et al.) that uses the longest protein-coding translation of  
1035 each gene with searches of the TreeFam (Schreiber et al.) library of sequence profiles  
1036 followed by multiple sequence alignments with combinations of various aligners and then tree  
1037 building with TreeBeST (Vilella et al.). This revealed orthologs in other Brachycera flies  
1038 (*Musca domestica* and five *Glossina* species), three non-holometabolous insects (*Rhodnius*  
1039 *prolixus*, *Cimex lectularius*, and *Pediculus humanus*), and the tick, *Ixodes scapularis* (Figure  
1040 S3), as well as potential orthologs in two sandflies (incomplete gene models make orthology  
1041 difficult to confirm with confidence). Second, the *D. melanogaster* Hemolectin protein  
1042 sequence was searched using tBLASTn against all nucleotide data (genomes, transcriptomes,  
1043 ESTs, etc.) from all species hosted by VectorBase. These searches confirmed the results from  
1044 the automated GeneTree ortholog identification, i.e. several matches to mosquito genes that  
1045 encode von Willebrand factor domains but no *Hemolectin* orthologs in mosquitoes. For a  
1046 broader perspective across arthropods, searches of OrthoDB identified *Hemolectin* orthologs  
1047 in many different groups including additional non-mosquito Diptera, as well as in  
1048 Lepidoptera, Coleoptera, Hymenoptera, Hemiptera, Thysanoptera, Isoptera, Blattodea,

1049 Ephemeroptera, Odonata, Diplura, Collembola, Crustacea, Myriapoda, and Arachnida, but no  
1050 orthologs in any mosquito species. These analyses strongly support the evolutionarily-rare  
1051 loss of the *Hemolectin* gene from the genome of the last common ancestor of mosquitoes.

1052

1053

1054

1055

1056

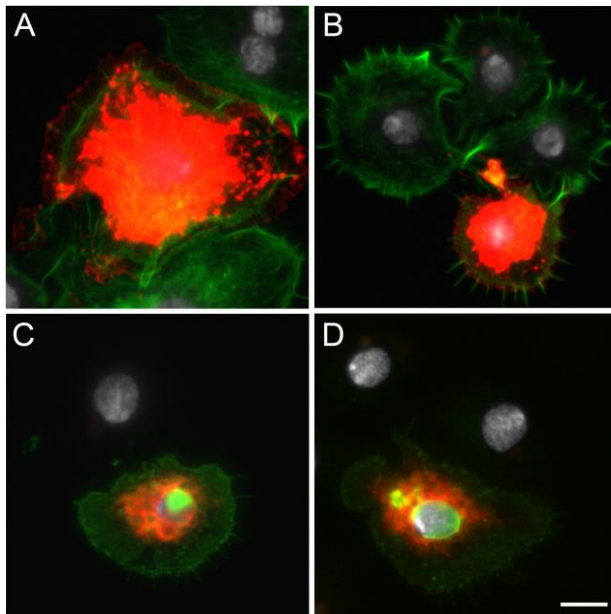

1057

1058 **Figure S1. Hemocytes collected from *hml*>mCD8::Cherry blood fed females.** (A, B) Over  
1059 exposition of pictures I and J (Figure 2) showing Cherry at the cell membrane. Red:  
1060 endogenous mCD8::Cherry; Green: Phalloidin; White: DAPI staining. (C, D) Anti-mCD8  
1061 antibody staining. Red: endogenous mCD8::Cherry; Green: anti-mCD8; White: DAPI  
1062 staining. Scale bar is 5  $\mu$ m.

1063

1064

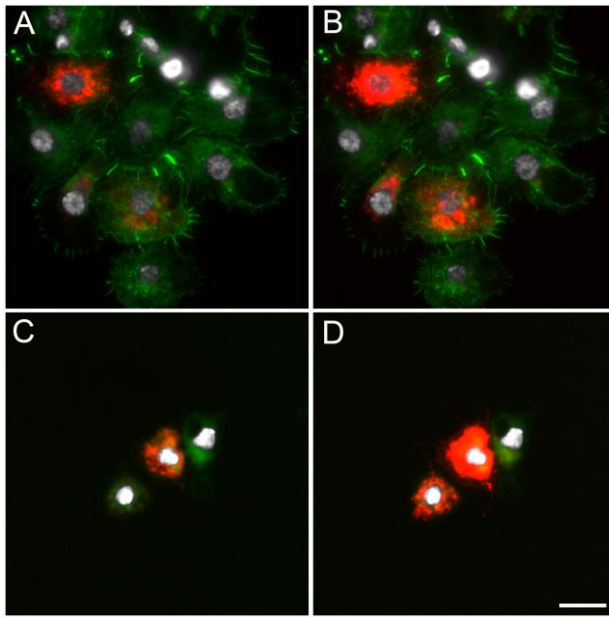

1065

1066 **Figure S2. Hemocytes collected from *hml*>*mCD8::Cherry* blood fed females.** B and D are

1067 highly exposed pictures from A and B respectively. Red: endogenous *mCD8::Cherry*; Green:

1068 Phalloidin; White: DAPI staining. Scale bar is 10  $\mu$ m.

1069

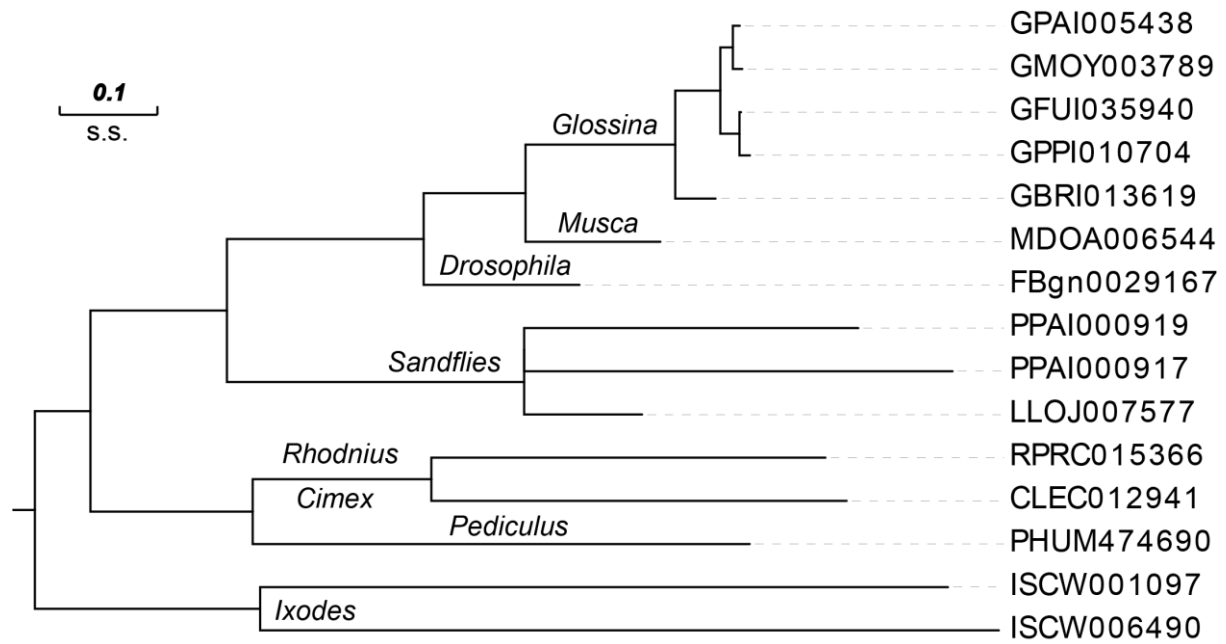

1070

1071 **Figure S3. *Hemolectin* gene tree from VectorBase.** Orthologs of *Drosophila melanogaster*  
 1072 *hemolectin* were found in other Brachycera flies and outgroup non-holometabolous insects  
 1073 and the *Ixodes* tick. Note that the two *Phlebotomus papatasi* genes are likely fragments of a  
 1074 single gene, similarly for the two *Ixodes scapularis* genes. No orthologs were found in any of  
 1075 the mosquito species at VectorBase.

1076

1077 **Table S1. Sequence of primers used in the study.**

| Gene          | Forward primer                    | Reverse primer                        |
|---------------|-----------------------------------|---------------------------------------|
| <i>S7</i>     | AGGCGATCATCATCTACGTGC             | GTAGCTGCTGCAAACCTTCGG                 |
| <i>gal4</i>   | TGAAGCTACTGTCTTCTATCG             | GTAGCGACACTCCCAGTTG                   |
| <i>cherry</i> | tagcagccagatctGTCGACGGTATCGATAAGC | tagcagccTCTAGATTACTTGTACAGCTCGTCCATGC |

1078
